# Supplementary material for: Zirconium phosphate supported-silver nanoparticles for selective hydrogenation of nitrobenzene into azoxybenzene compounds
Source: Royal Society of Chemistry journal article supplement (doi:10.1039/d3nj00518f), 2023-01-01
Supplement: d3nj00518f1.pdf [file d3nj00518f1.pdf]

*Supporting information*

**Zirconium Phosphate Supported-Silver Nanoparticles for Selective  
Hydrogenation of Nitrobenzene into Azoxybenzene Compounds**

Yuxi Qin<sup>a</sup>, Yongjun Jiang<sup>b</sup>, Xinjia Wei<sup>a</sup>, Yuan Ma<sup>a</sup>, Huiying Liao<sup>a</sup>, Qingpo Peng<sup>a</sup>, Sheng Dai<sup>b</sup>,

Zhiqiang Wang<sup>a,\*</sup>, Xiuge Zhao<sup>a,\*</sup>, and Zhenshan Hou<sup>a,c,\*</sup>

<sup>a</sup> State Key Laboratory of Green Chemical Engineering and Industrial Catalysis, Research Institute of Industrial Catalysis, School of Chemistry & Molecular Engineering, East China University of Science and Technology, Shanghai 200237, China. E-mail: houzhenshan@ecust.edu.cn; Tel: +86 21 64251686.

<sup>b</sup>Key Laboratory for Advanced Materials and Feringa Nobel Prize Scientist Joint Research Center, Institute of Fine Chemicals, School of Chemistry & Molecular Engineering, East China University of Science and Technology, Shanghai 200237, China.

<sup>c</sup>Shanghai Key Laboratory of Green Chemistry and Chemical Processes, School of Chemistry and Molecular Engineering, East China Normal University, Shanghai, 200062, China

\*Corresponding author: Email: houzhenshan@ecust.edu.cn

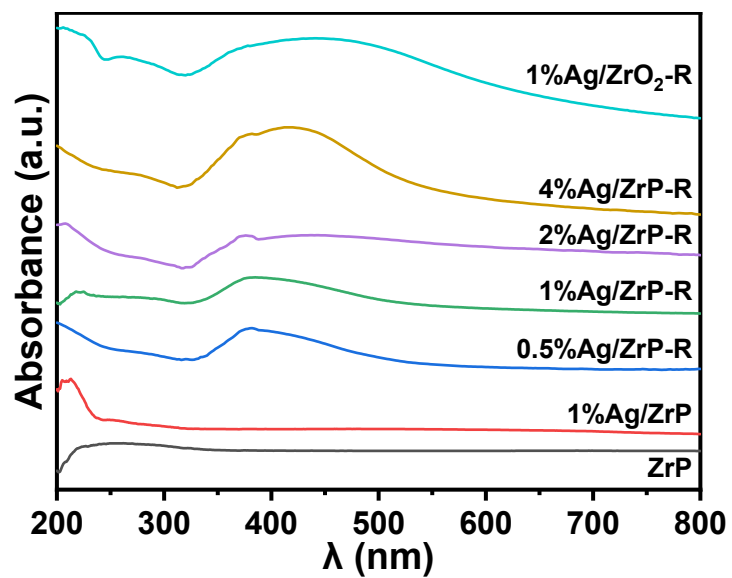

**Fig. S1** UV-Vis DRS of the catalysts.

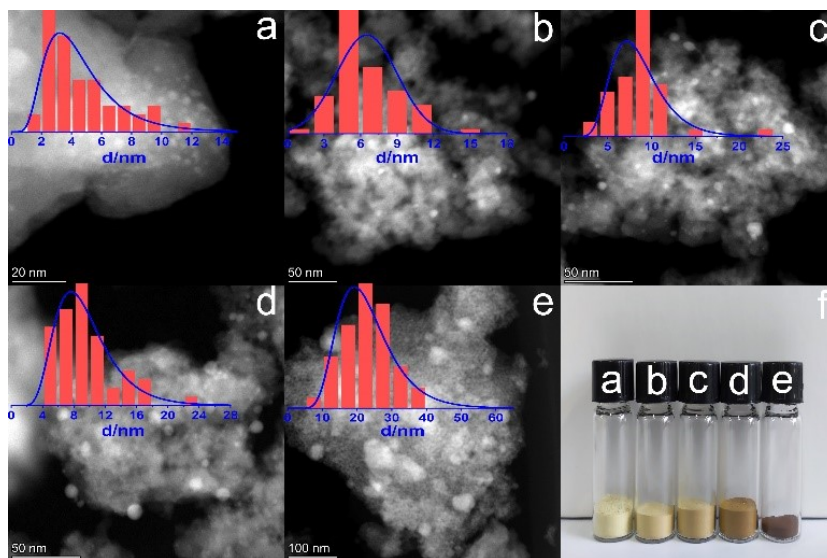

**Fig. S2** HAADF-STEM images and particle size distributions of a) 0.5%Ag/ZrP-R, b) 1%Ag/ZrP-R, c) 2%Ag/ZrP-R, d) 4%Ag/ZrP-R and e) 1%Ag/ZrO<sub>2</sub>-R. f) The appearance of catalysts.

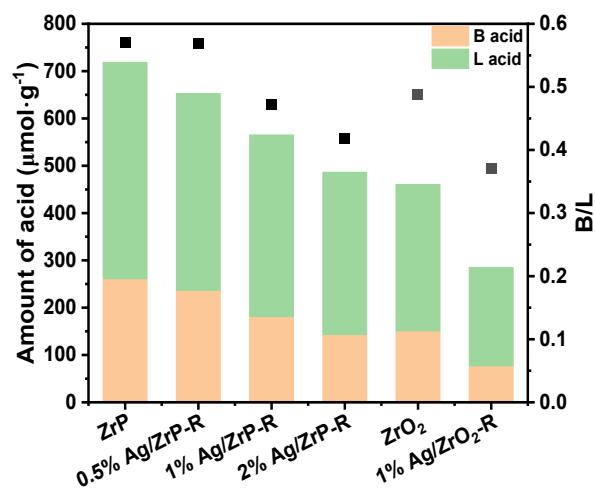

Fig. S3 Quantitative analysis of py-IR spectra of the catalysts. The solid square points denote the ratio of B/L. B=Brønsted acid. L=Lewis acid.

**Table S1** Catalytic performance of 1%Ag/ZrP-R in different solvents.

| Entry          | Solvent            | T(°C) | t(min) | Conv. (%) <sup>a</sup> | Sel. (%) |     |     |     |
|----------------|--------------------|-------|--------|------------------------|----------|-----|-----|-----|
|                |                    |       |        |                        | AN       | AZB | AOB | NSB |
| 1              | MeOH               | 20    | 3      | 99                     | -        | -   | 99  | -   |
| 2 <sup>b</sup> | MeOH               | 20    | 30     | -                      | -        | -   | -   | -   |
| 3 <sup>c</sup> | MeOH               | 20    | 30     | -                      | -        | -   | -   | -   |
| 4              | THF                | 20    | 30     | -                      | -        | -   | -   | -   |
| 5              | 1,4-dioxane        | 20    | 30     | -                      | -        | -   | -   | -   |
| 6              | CH <sub>3</sub> CN | 20    | 30     | 28                     | -        | 56  | 43  | -   |
| 7              | EtOH               | 20    | 30     | 57                     | -        | 3   | 96  | -   |
| 8              | H <sub>2</sub> O   | 20    | 30     | 41                     | 6        | 2   | 16  | 75  |

<sup>a</sup>Reaction conditions unless otherwise noted: 1.7 mmol NB, 2.5 mmol NaBH<sub>4</sub>, 75 mg 1%Ag/ZrP-R, 5 mL solvent, stirring rate: 400 rpm. <sup>b</sup>Reaction was carried out without catalyst. <sup>c</sup>ZrP was used as a catalyst.

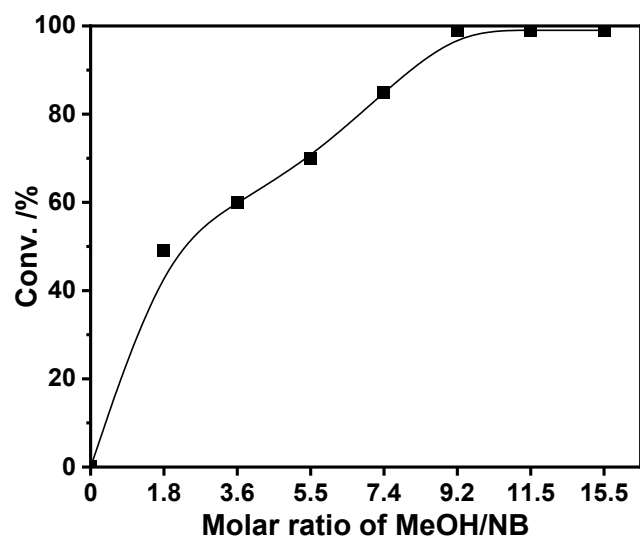

**Fig. S4** Catalytic performance of 1%Ag/ZrP-R with varying mass of MeOH. Reaction conditions unless otherwise noted: 1.7 mmol NB, 2.5 mmol NaBH<sub>4</sub>, 75 mg 1%Ag/ZrP-R, stirring rate: 400 rpm.

**Table S2** Catalytic performance of 1%Ag/ZrP-R using different reductants.<sup>a</sup>

| Entry | Reductants                      | T(°C) | t(min) | Conv.(%) | Sel.(%) |     |     |     |
|-------|---------------------------------|-------|--------|----------|---------|-----|-----|-----|
|       |                                 |       |        |          | AN      | AZB | AOB | NSB |
| 1     | IPA <sup>b</sup>                | 20    | 60     | -        | -       | -   | -   | -   |
| 2     | HCOOH <sup>c</sup>              | 20    | 10     | -        | -       | -   | -   | -   |
| 3     | H <sub>2</sub> <sup>d</sup>     | 120   | 240    | -        | -       | -   | -   | -   |
| 4     | Hydrazine                       | 20    | 10     | 5        | -       | -   | -   | 99  |
| 5     | NaBH(AcO) <sub>3</sub>          | 20    | 30     | -        | -       | -   | -   | -   |
| 6     | TBABH <sub>4</sub> <sup>e</sup> | 20    | 20     | 78       | -       | 18  | 82  | -   |
| 7     | NaBH <sub>4</sub>               | 20    | 3      | 99       | -       | 1   | 99  | -   |

<sup>a</sup>Reaction conditions unless otherwise noted: 1.7 mmol NB, 2.5 mmol reductant, 75 mg 1%Ag/ZrP-R, 5 mL MeOH, stirring rate: 400 rpm. <sup>b</sup>IPA denoted isopropyl alcohol. <sup>c</sup>10 mmol HCOOH was used. <sup>d</sup>3 MPa H<sub>2</sub>. <sup>e</sup>TBABH<sub>4</sub> denoted tetrabutylammonium borohydride.

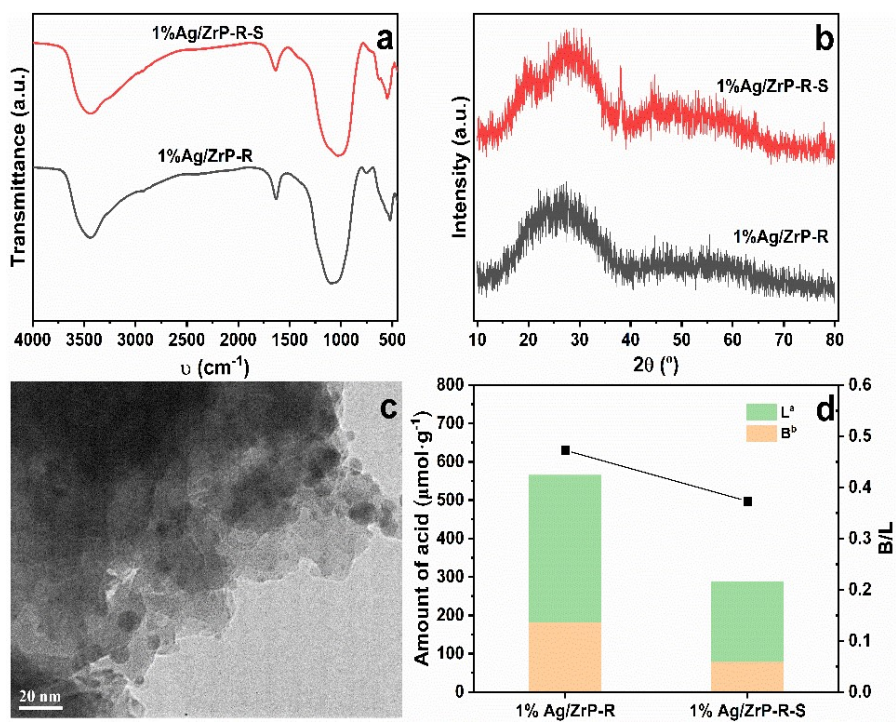

**Fig. S5** a) The FT-IR spectra and b) XRD patterns of fresh and used 1%Ag/ZrP-R, c) HRTEM images of 1%Ag/ZrP-R-S and d) FT-IR spectra of pyridine adsorbed on the fresh and spent catalysts. 1%Ag/ZrP-R-S denoted the spent catalyst after 10 catalytic cycles.



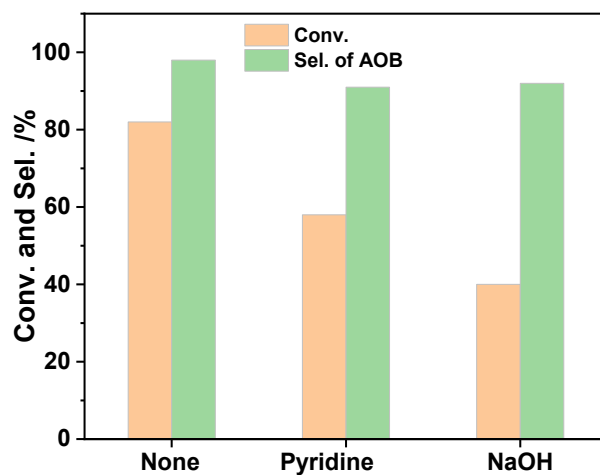

**Fig. S6** The effect of base treatment on catalytic performance of 1%Ag/ZrP-R. The catalysts were pretreated with 0.1M methanol solution of NaOH or pyridine for 30 min and then washed with MeOH and H<sub>2</sub>O for 3 times prior to reaction. Reaction conditions unless otherwise noted: 1.7 mmol NB, 2.5mmol NaBH<sub>4</sub>, 75mg 1%Ag/ZrP-R, 5 mL MeOH, stirring rate: 400 rpm.

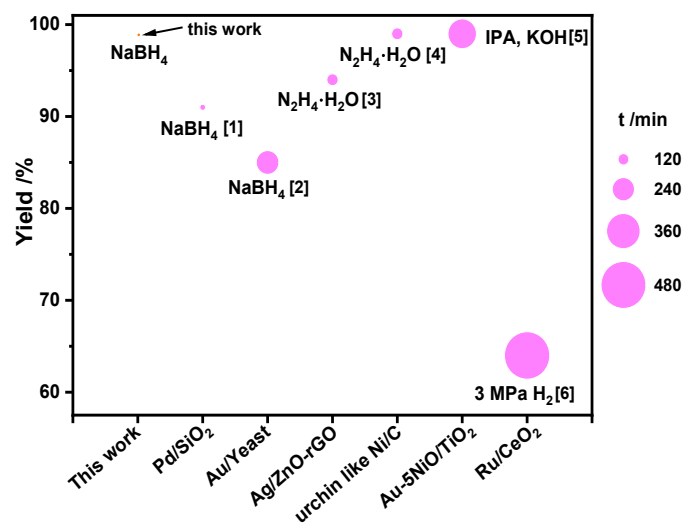

**Fig. S7** Comparison of the 1%Ag/ZrP-R catalyst and reported catalytic systems in selective hydrogenation of NB into AOB. The reference numbers were shown in parenthesis.

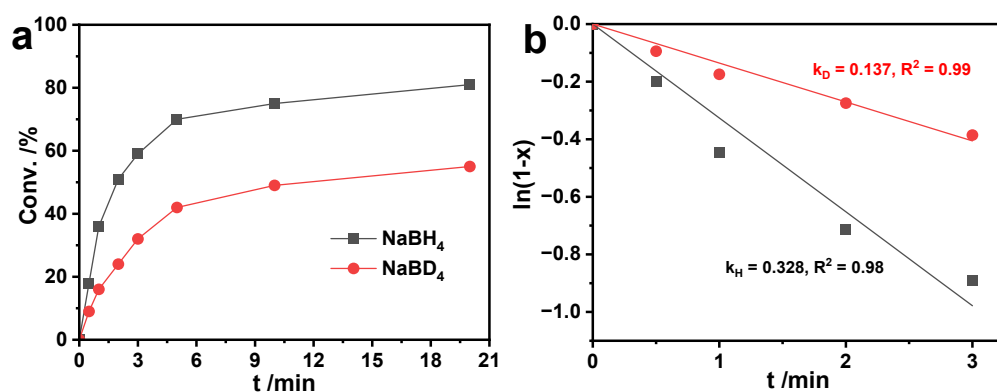

**Fig. S8** Kinetic analysis of the 1%Ag/ZrP-R-catalyzed reduction of NB with NaBH<sub>4</sub> or NaBD<sub>4</sub>. a) NB conversion as a function of reaction time and b) kinetic isotope effect in NB hydrogenation with either NaBH<sub>4</sub> or NaBD<sub>4</sub> as a reductant. Reaction conditions: - 15°C, 1.7 mmol NB, 2.5 mmol NaBH<sub>4</sub> or NaBD<sub>4</sub>, 75 mg 1%Ag/ZrP-R, 5 mL MeOH, stirring rate: 400 rpm.

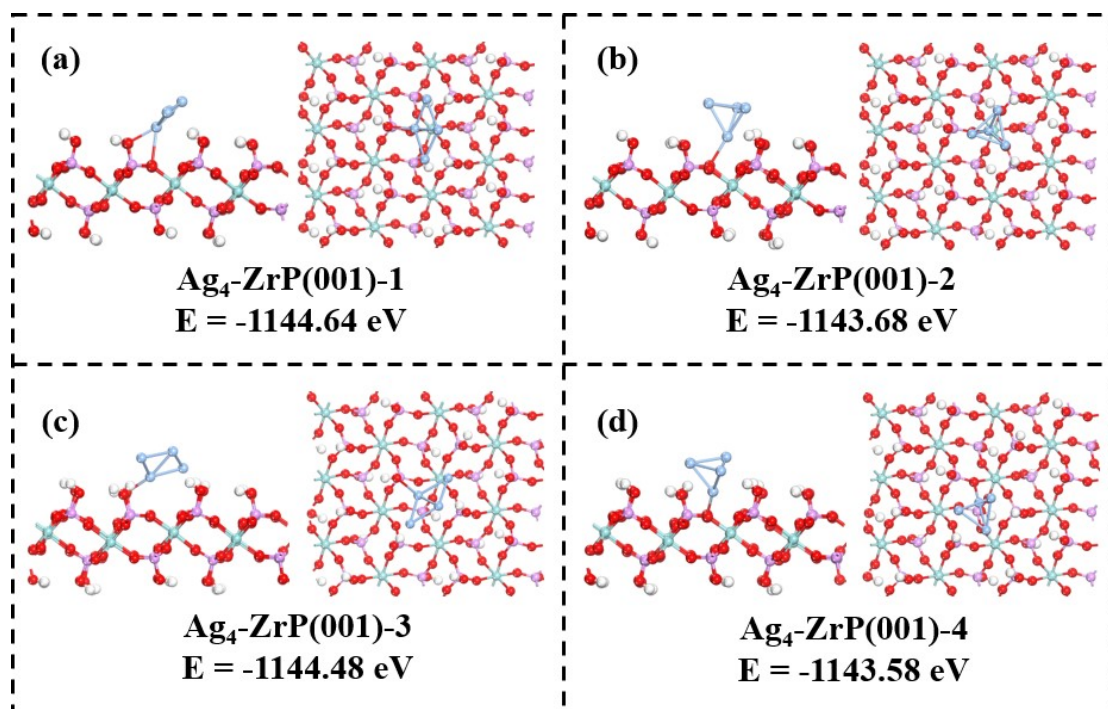

Figure S9. Calculated different structures of  $\text{Ag}_4$  clusters stabilized over ZrP. Red: O atoms; white: H atoms; plum: P atoms; light green: Zr atoms; light blue: Ag atoms, respectively.

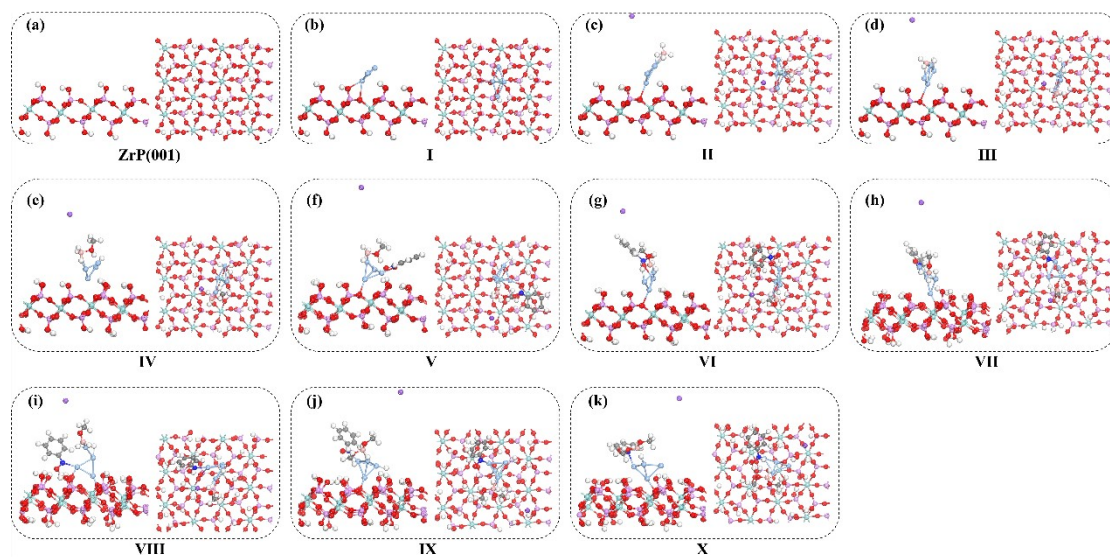

Figure S10. Calculated structure of (a)ZrP and (b-k) the key states within the NB selective hydrogenation to AOB at  $\text{Ag}_4\text{-ZrP}$  (001) surface. Red: O atoms; white: H atoms; grey: C atoms; blue: N atoms; pink: B atoms; purple: Na atoms; plum: P atoms; light green: Zr atoms; light blue: Ag atoms, respectively.

## References

1. B. Lakshminarayana, A. K. Manna, G. Satyanarayana and C. Subrahmanyam, *Catal. Lett.*, 2020, **150**, 2309-2321.
2. S. Krishnan, P. N. Patel, K. K. Balasubramanian and A. Chadha, *New J. Chem.*, 2021, **45**, 1915-1923.
3. B. Paul, S. Vadivel, N. Yadav and S. S. Dhar, *Catal. Commun.*, 2019, **124**, 71-75.
4. M. N. Pahalagedara, L. R. Pahalagedara, J. He, R. Miao, B. Gottlieb, D. Rathnayake and S. L. Suib, *J. Catal.*, 2016, **336**, 41-48.
5. J.-X. Zhao, C.-Q. Chen, C.-H. Xing, Z.-F. Jiao, M.-T. Yu, B.-B. Mei, J. Yang, B.-Y. Zhang, Z. Jiang and Y. Qin, *ACS Catal.*, 2020, **10**, 2837-2844.
6. B. Wu, T. Lin, R. Yang, M. Huang, H. Zhang, J. Li, F. Sun, F. Song, Z. Jiang, L. Zhong and Y. Sun, *Green Chem.*, 2021, **23**, 4753-4761.
